# Supplementary material
Source: PubMed Central journal article supplement (PMC2910849)
Supplement: NIHMS207887-supplement-01.pdf [file NIHMS207887-supplement-01.pdf]

## Supplementary Figure 1

Fabbrini E, Tamboli RA, Magkos F, Marks PA, Eckhauser AW, Richards WO, Klein S, Abumrad NN. Surgical removal of omental fat does not improve insulin sensitivity and cardiovascular risk factors in obese adults.

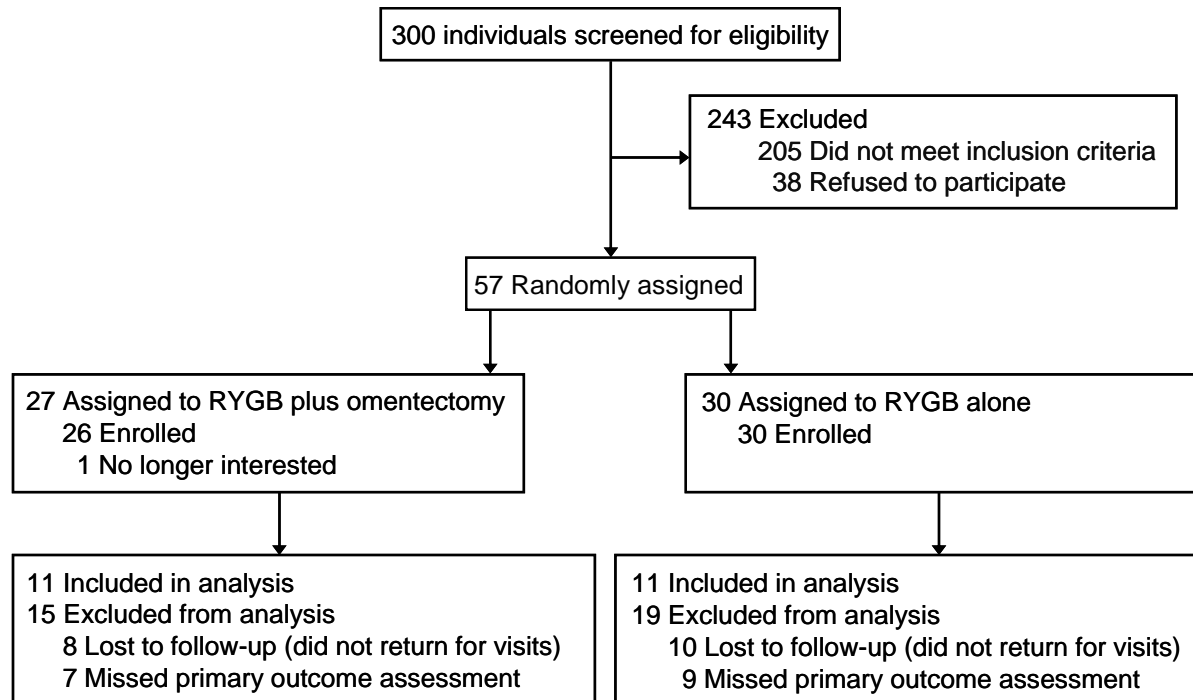

### Supplementary Figure 1: Trial profile of Study 1

Of the 56 subjects who had surgery, 18 were lost to follow-up and 16 were seen but refused to undergo the primary outcome measure (hyperinsulinemic glucose clamp procedure with radioactive tracer infusion). Weight loss and available metabolic outcomes for subjects who did not complete the entire study are included in the supplementary tables of results.
