# Supplementary material
Source: PubMed Central journal article supplement (PMC2910849)
Supplement: NIHMS207887-supplement-02.pdf [file NIHMS207887-supplement-02.pdf]

## Supplementary Tables

Fabbrini E, Tamboli RA, Magkos F, Marks PA, Eckhauser AW, Richards WO, Klein S, Abumrad NN. Surgical removal of omental fat does not improve insulin sensitivity and cardiovascular risk factors in obese adults.

**Table 1.** Characteristics of completers and non-completers before surgery (baseline).

**Table 2.** Characteristics of completers and non-completers at 6 months after surgery.

**Table 3.** Characteristics of completers and non-completers at 12 months after surgery.

**Supplementary Table 1:** Characteristics of completers and non-completers before surgery (baseline).

| Before surgery                       | Completers (n=22) | Non-completers (n=34) | P value |
|--------------------------------------|-------------------|-----------------------|---------|
| Omentectomy                          | 11                | 15                    | 0.666   |
| Females                              | 18                | 31                    | 0.301   |
| Type 2 diabetes                      | 14                | 13                    | 0.029   |
| Age (years)                          | 44 (40-48)        | 44 (40-47)            | 0.868   |
| Body mass index (kg/m <sup>2</sup> ) | 47.6 (43.9-51.2)  | 48.1 (45.2-51.1)      | 0.809   |
| Body fat (% body weight)             | 48 (45-50)        | 50 (48-52)            | 0.220   |
| Cholesterol (mg/dL)                  | 189 (175-203)     | 184 (173-195)         | 0.593   |
| LDL-cholesterol (mg/dL)              | 108 (96-120)      | 107 (98-117)          | 0.885   |
| HDL-cholesterol (mg/dL)              | 47 (42-52)        | 48 (44-52)            | 0.770   |
| Triglyceride (mg/dL)                 | 169 (138-200)     | 145 (121-170)         | 0.244   |
| Glucose (mg/dL)                      | 125 (109-141)     | 124 (111-137)         | 0.934   |
| Insulin (mU/L)                       | 25 (20-30)        | 20 (16-24)            | 0.115   |
| HOMA2-IR                             | 4.3 (3.4-5.1)     | 3.5 (2.8-4.2)         | 0.159   |
| Free fatty acids (mmol/L)            | 0.71 (0.61-0.80)  | 0.71 (0.63-0.79)      | 0.987   |
| Leptin (ng/mL)                       | 39 (33-44)        | 38 (33-42)            | 0.734   |
| Adiponectin (µg/mL)                  | 8.2 (5.9-10.4)    | 7.9 (5.9-9.8)         | 0.846   |

**Supplementary Table 2:** Characteristics of completers and non-completers at 6 months after surgery.

| 6 months post-surgery                | Completers (n=22) | Non-completers (n=20) | P value |
|--------------------------------------|-------------------|-----------------------|---------|
| Omentectomy                          | 11                | 8                     | 0.516   |
| Females                              | 18                | 19                    | 0.188   |
| Type 2 diabetes                      | 14                | 5                     | 0.005   |
| Age (years)                          | 44 (40-48)        | 42 (38-47)            | 0.642   |
| Body mass index (kg/m <sup>2</sup> ) | 34.4 (31.4-37.3)  | 35.0 (31.9-38.1)      | 0.771   |
| Weight loss (%)                      | 28 (26-30)        | 28 (25-30)            | 0.996   |
| Cholesterol (mg/dL)                  | 195 (140-250)     | 145 (132-157)         | 0.215   |
| LDL-cholesterol (mg/dL)              | 105 (55-156)      | 83 (72-94)            | 0.641   |
| HDL-cholesterol (mg/dL)              | 57 (40-74)        | 44 (40-48)            | 0.317   |
| Triglyceride (mg/dL)                 | 97 (80-115)       | 99 (81-118)           | 0.886   |
| Glucose (mg/dL)                      | 95 (89-100)       | 90 (84-95)            | 0.225   |
| Insulin (mU/L)                       | 8 (6-10)          | 8 (6-11)              | 0.757   |
| HOMA2-IR                             | 1.3 (1.0-1.7)     | 1.4 (1.0-1.8)         | 0.838   |
| Free fatty acids (mmol/L)            | 0.58 (0.51-0.64)  | 0.65 (0.58-0.73)      | 0.155   |

**Supplementary Table 3:** Characteristics of completers and non-completers at 12 months after surgery.

| 12 months post-surgery               | Completers (n=22) | Non-completers (n=19) | P value |
|--------------------------------------|-------------------|-----------------------|---------|
| Omentectomy                          | 11                | 8                     | 0.613   |
| Females                              | 18                | 18                    | 0.207   |
| Type 2 diabetes                      | 14                | 7                     | 0.045   |
| Age (years)                          | 44 (40-48)        | 43 (39-47)            | 0.730   |
| Body mass index (kg/m <sup>2</sup> ) | 31.3 (28.5-34.2)  | 32.0 (28.9-35.0)      | 0.768   |
| Weight loss (%)                      | 35 (32-37)        | 33 (30-36)            | 0.406   |
| Cholesterol (mg/dL)                  | 152 (139-166)     | 153 (138-168)         | 0.942   |
| LDL-cholesterol (mg/dL)              | 86 (74-98)        | 84 (71-97)            | 0.822   |
| HDL-cholesterol (mg/dL)              | 50 (46-54)        | 52 (48-56)            | 0.468   |
| Triglyceride (mg/dL)                 | 83 (68-98)        | 89 (73-106)           | 0.599   |
| Glucose (mg/dL)                      | 97 (86-107)       | 91 (80-103)           | 0.506   |
| Insulin (mU/L)                       | 7 (5-8)           | 8 (6-10)              | 0.228   |
| HOMA2-IR                             | 1.1 (0.9-1.4)     | 1.3 (1.1-1.6)         | 0.266   |
| Free fatty acids (mmol/L)            | 0.54 (0.47-0.61)  | 0.58 (0.50-0.66)      | 0.518   |

Values are frequencies and compared with  $\chi^2$  test, or means with 95% confidence intervals and compared with one-way analysis of covariance (adjusting for diabetes status to account for the fact that more diabetics completed the study than not).

Abbreviations: LDL, low-density lipoprotein; HDL, high-density lipoprotein; HOMA2-IR, updated homeostasis model assessment of insulin resistance.

To convert the values for glucose to mmol/L, multiply by 0.05551. To convert the values for insulin to pmol/L, multiply by 6. To convert the values for cholesterol to mmol/L, multiply by 0.0259. To convert the values for triglyceride to mmol/L, multiply by 0.0113.
